# Supplementary material
Source: PubMed Central journal article supplement (PMC7533079)
Supplement: NIHMS1632210-supplement-1.pdf [file NIHMS1632210-supplement-1.pdf]

## Supplementary Information

**Ms. Ref. No.:** TOXLET-D-19-00757

**Title:** Effect of PFOA on DNA Methylation and Alternative Splicing in Mouse Liver

**Author(s):** Yi Wen, Jackie Chen, Junya Li, Waqar Arif, Auinash Kalsotra, Joseph Irudayaraj

**Table S1 Sequences of primers sets used for gene expression analysis**

| Target              | Forward primer                  | Reverse primer                 |
|---------------------|---------------------------------|--------------------------------|
| <b><i>GAPDH</i></b> |                                 |                                |
| <i>Kitl</i>         | 5'-AGTGCTTCGCTGTGAACCCTGC-3'    | 5'-CCAAGCCATGCAAACGGTGCAA-3'   |
| <i>Mtorc1</i>       | 5'-GAACCTCAGGGCAAGATGCT-3'      | 5'-TCTTCAGTCCACTGGCGAAC-3'     |
| <i>Ccna2</i>        | 5'-GCTCTACTGCCCGGAGGCTGA-3'     | 5'-TGGCCTACATGTCTCTGGGGAA-3'   |
| <i>Ccnb1</i>        | 5'-TGCATTCTCTCAGTGCCCTCCACA-3'  | 5'-AGACAGGAGTGGCGCCTTGGT-3'    |
| <i>Ccne1</i>        | 5'-GGTGTCTCTCGCTGCTTCTGCTT-3'   | 5'-CCGGATAACCATGGCGAACGGA-3'   |
| <i>Bcl2</i>         | 5'- ATGCCTTTGTGGAACATATATGGC-3' | 5'- GGTATGCACCCAGAGTGATGC-3'   |
| <i>Bax</i>          | 5'- TGAAGACAGGGGCCTTTTTG-3'     | 5'- AATTCGCCGGAGACTCG-3'       |
| <i>Dnmt1</i>        | 5'-GGAAGGCTACCTGGCTAAAGTCAAG-3' | 5'-ACTGAAAGGGTGTCACTGTCCGAC-3' |
| <i>Dnmt3a</i>       | 5'-TGGAGAATGGCTGCTGTGTGAC-3'    | 5'-CACTCATCCCGTTTCCGTTGG-3'    |
| <i>Dnmt3b</i>       | 5'-AGTGACCAGTCCCTCAGACACGAAG-3' | 5'-ATCAGAGCCATTCCCATCATCTAC-3' |
| <i>Tet1</i>         | 5'-ACATCCCACAGACCGAAGAT-3'      | 5'-TTCTGGGGTTTTCACTCCTC-3'     |
| <i>Tet2</i>         | 5'-AGAGCCTCAAGGCAACCAAAA-3'     | 5'-ACATCCCTGAGAGCTCTTGC-3'     |
| <i>Tet3</i>         | 5'-CCGGATTGAGAAGGTCATCTAC-3'    | 5'-AAGATAACAATCACGGCGTTCT-3'   |
| <i>Pten</i>         | 5'-GCAGAGCAAGCTCAGTGTGGGT-3'    | 5'-AGGGGGCAAGGTAGGTACGCAT-3'   |
| <i>Tsc1</i>         | 5'-ATGCTGCTGTGGGTGGGTGTA-3'     | 5'-AGGGTGAACCATGACCAGCCA-3'    |
| <i>Esrp2</i>        | GGCTCATCTCCTCTGTGGAA            | CCAGATGATGTCGGTGGAG            |
| <i>Srsf1</i>        | GGGTAACCTACCTCCGGATA            | CGGTTCTTCAGGTCGATG             |
| <i>HnrnpH</i>       | CAAGGAGCAGTGAACAGCAG            | TACATTCCCCATCCACCACT           |
| <i>HnrnpC</i>       | GAATCCACTTTTGCCCCTTC            | GGTTCTCTCTCTCTCTCTA            |
| <i>Mbn1</i>         | GTTGCAGCTAGGAAAGGCTA            | CACTTCTCCCATTCCCACT            |
| <i>HnrnpA1</i>      | GTCCGAGTCTCCCAAGGAGCC           | TGACAAACCCAAAGCCCCTGG          |
| <i>Rbfox2</i>       | GGCGCACTATGCTCTTCTTG            | CCACCTCCGTCCTGTACCTA           |
| <i>Celf1</i>        | AGGACCTGGTCTGAGAAAGA            | GGCTCCTATCCCTTAGGATG           |

**Supplementary Table S2: Antibodies used in Western blot experiments**

| Target          | Type | Assay | Origin | Dilution | Source              | Catalogue No. |
|-----------------|------|-------|--------|----------|---------------------|---------------|
| ESRP2           | 1°   | WB    | Mouse  | 1:5000   | Rockland            | 210-301-C31   |
| SRSF1           | 1°   | WB    | Rabbit | 1:5000   | Abcam               | ab38017       |
| hnRNP H         | 1°   | WB    | Rabbit | 1:10000  | Abcam               | ab10374       |
| PABPN1          | 1°   | WB    | Rabbit | 1:5000   | Abcam               | ab75855       |
| PABPC1          | 1°   | WB    | Rabbit | 1:5000   | Abcam               | ab21060       |
| CELF1           | 1°   | WB    | Mouse  | 1:1000   | Santa Cruz Biotech. | sc-20003      |
| PTBP1           | 1°   | WB    | Mouse  | 1:1000   | Invitrogen          | 32-4800       |
| TBP             | 1°   | WB    | Mouse  | 1:5000   | ThermoFisher        | MA5-14739     |
| Anti-Mouse IgG  | 2°   | WB    | Goat   | 1:5000   | Bio-Rad             | 1721011       |
| Anti-Rabbit IgG | 2°   | WB    | Goat   | 1:5000   | ThermoFisher        | SA5-10033     |

### Supplementary Table S3: RT-PCR Primers

| Event       | Forward Primer(5'-3') | Reverse Primer(5'-3') |
|-------------|-----------------------|-----------------------|
| Arhgef10_15 | CTGCTCAATGACATGCTGGT  | TCCTGACCCACCTTACCAC   |
| Gpcpd1_76   | TGTGTTGTGGAAAGCAGTGA  | GTGGATGCCAAACTGTCCAT  |
| Adams7_177  | TCCATCAGTCCTACCCAAGC  | AGTTTGAGTCTCCCGAGCTG  |
| Fanci_157   | CTTCGTGAAACCAAGCCAAT  | CGTTTTCGTCTTCCTCATCC  |
| Hjurp_79    | CGGAAACACCTTGAAACTG   | TAGCCACAATGGCCATATCA  |
| Rgs12_154   | CCCAGAAACCACTTGGCTAT  | ACCAGCAGGTAAGCGAAGAA  |
| Nf2_45      | ACACAGCGAGAGCTCAGACA  | ACAAGCCAGCCCTCTACTGA  |
| Yap1_48     | AACCAGCAGCAGCAAATACA  | CCTGAGACATCCCAGGAGAA  |
